# Supplementary material
Source: PubMed Central journal article supplement (PMC6697538)
Supplement: EMS84020-supplement-Supporting_information.pdf [file EMS84020-supplement-Supporting_information.pdf]

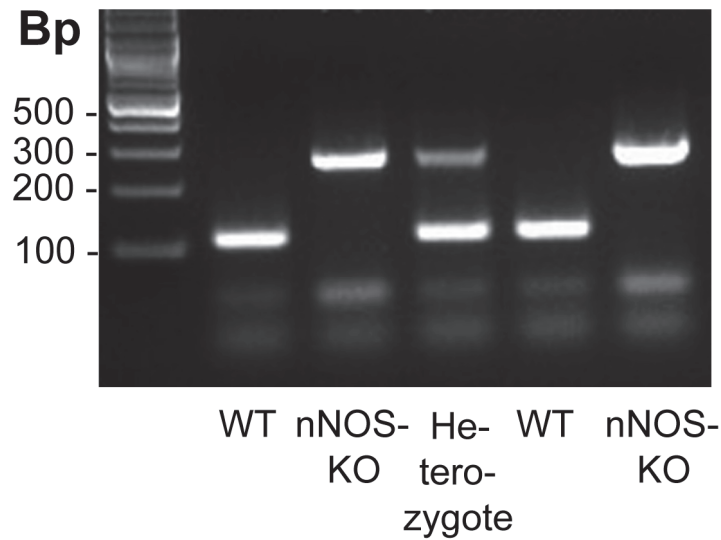

|                             | <b>Primer used</b>               |
|-----------------------------|----------------------------------|
| Genotyping-nNOS             | 5'-TCA GAT CTG ATC CGA GGA GG-3' |
| Genotyping-nNOS-reverse     | 5'-TTC CAG AGC GCT GTC ATA GC-3' |
| Genotyping-neomycin         | 5'-CTT GGG TGG AGA GGC TAT TC-3' |
| Genotyping-neomycin-reverse | 5'-AGG TGA GAT GAC AGG AGA TC-3' |

Baum et al.

**Supplementary Figure 1: Genotyping to demonstrate the absence of an intact nNOS gene in the genome of nNOS-KO mice and its presence in that of their WT littermates.** Using primers for exon-2 of the nNOS gene, a cDNA fragment of the neomycin resistance gene (280 base pairs (Bp) long) was amplified, whereas the presence of the nNOS gene was demonstrated by the amplification of its exon-2 containing fragment (117 Bp long).

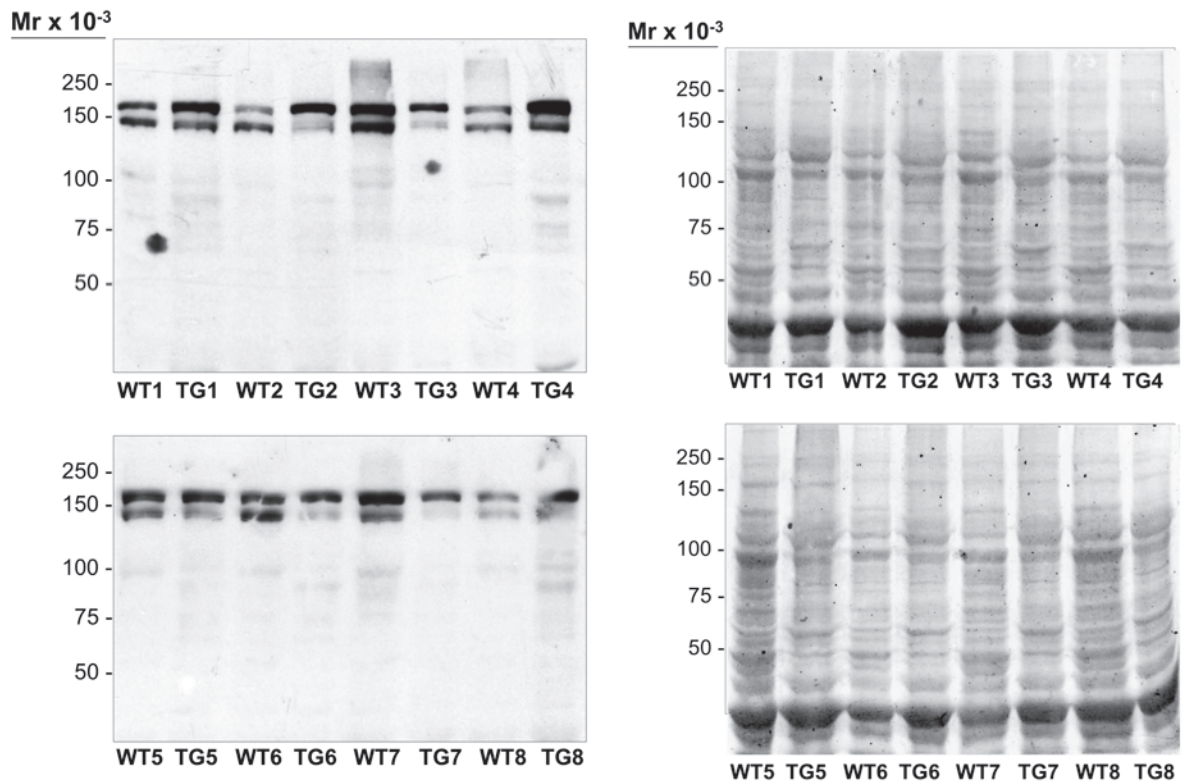

Baum et al.

**Supplementary Figure 2: Shift of the nNOS isoform expression pattern in the rectus femoris muscle of PGC-1alpha transgenic (TG) mice in comparison to wild-type (WT) littermates (left side) and the Ponceau Red-stained blot matrices (right side).** Note the higher expression of the alpha-isoform of nNOS (160 kDa) than the beta-isoform (140 kDa) in the PGC-1alpha TG mice than the WT mice. Shown are all immunoblots used for the densitometric analysis presented in Fig. 5C and 5D. Therefore, the densitometric values for nNOS-immunoreactive bands were normalized to the densitometric values of total protein loaded on the gels, as visualized by Ponceau Red-staining.

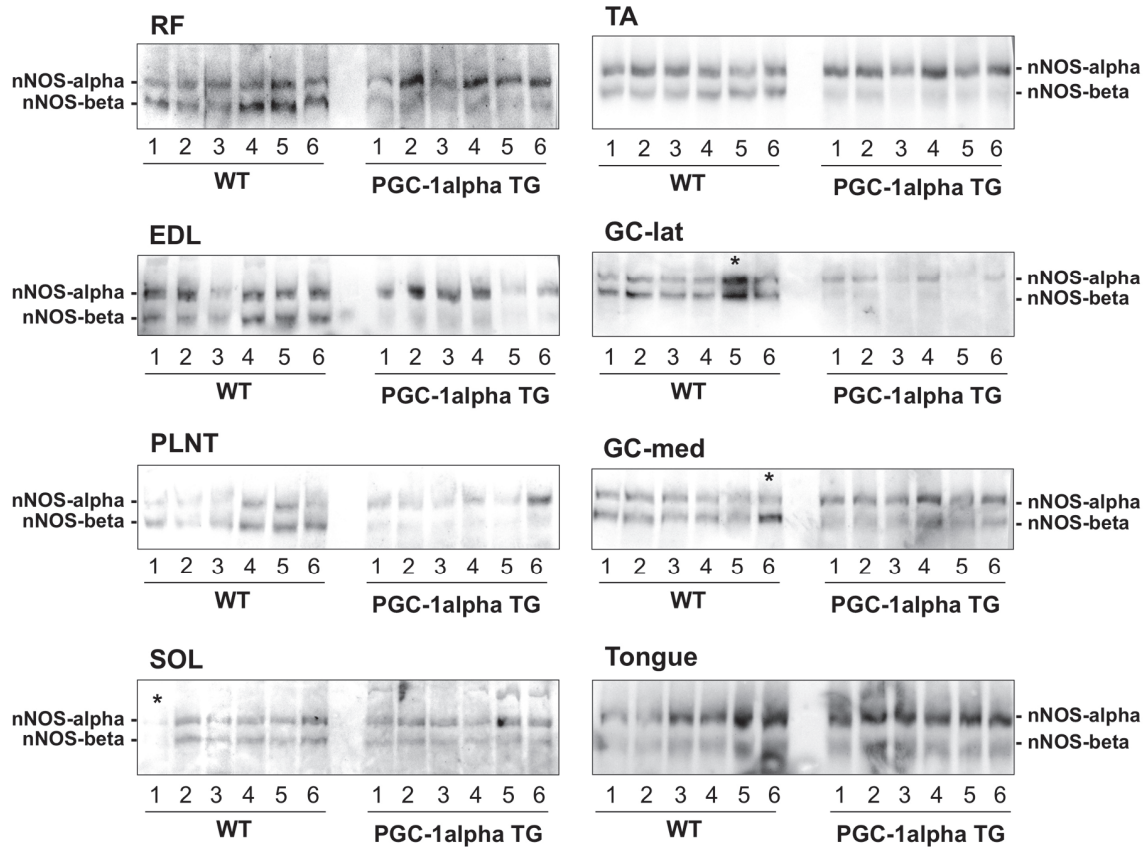

Baum et al.

**Supplementary Figure 3: Immunoblot analysis for the demonstration of nNOS isoform expression in eight striated muscles from PGC-1alpha TG mice and their WT littermates.** The immunoblots were used for the densitometric quantification of nNOS isoform expression shown in Fig. 5d and 5e. For both strains, detergent extracts of six mice (1-6) were subjected to the analysis. \* denote samples which were not included into the densitometry due to inaccurate gel loading and/or incorrect supply with ECL reagent during development of immunoblots.

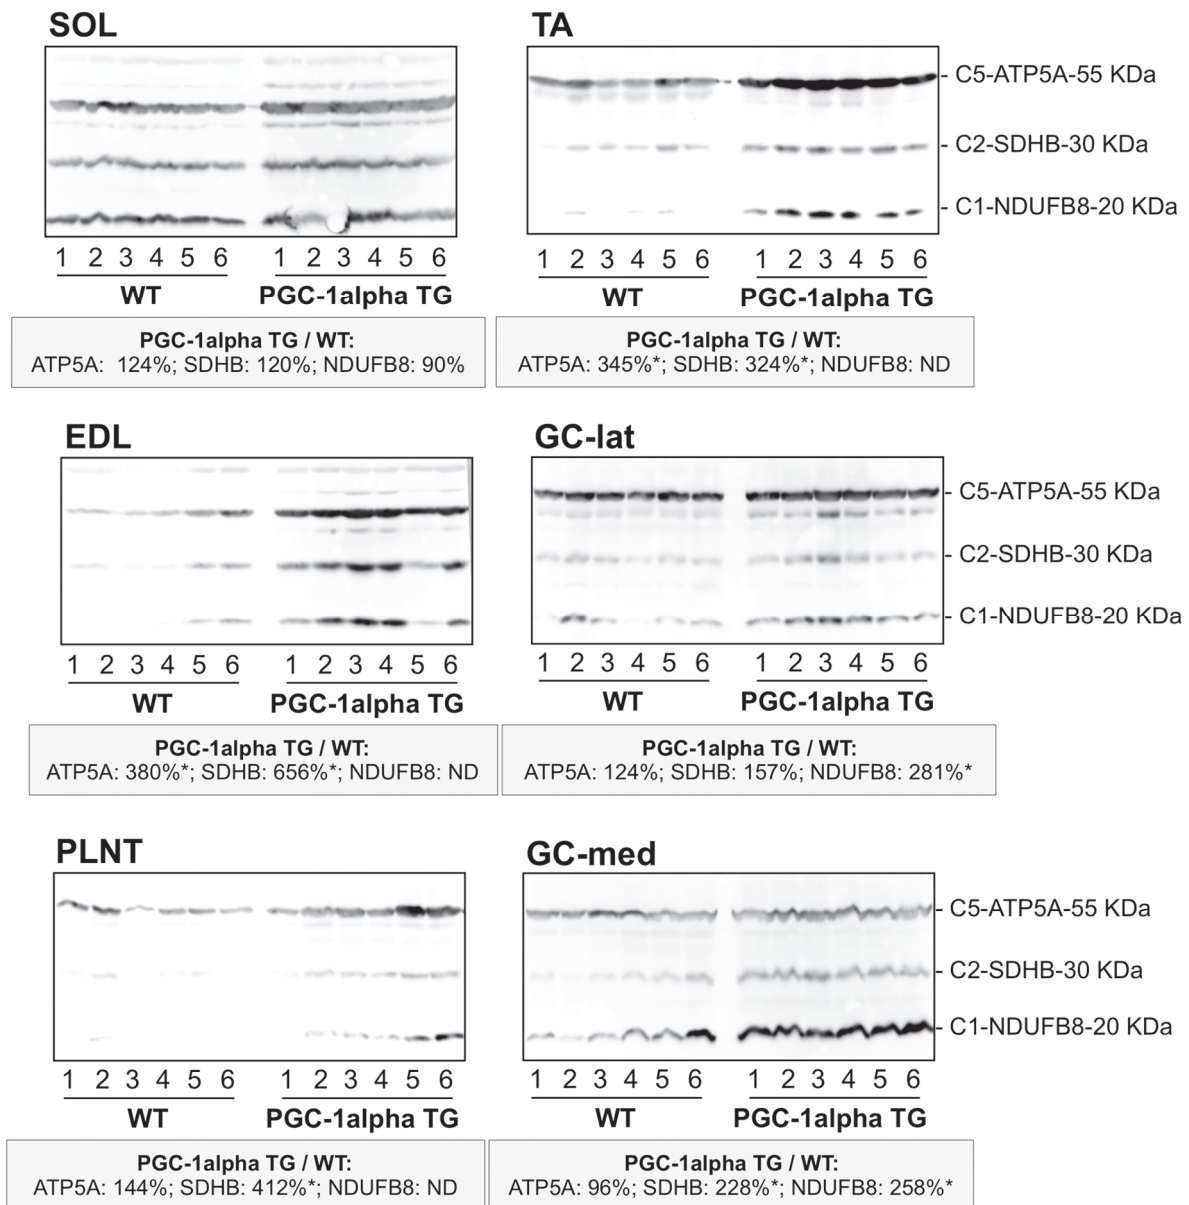

Baum et al.

**Supplementary Figure 4: Immunoblot analysis for the quantification of mitochondrial protein expression in six striated muscles from PGC-1alpha-TG mice and their WT littermates.** For both strains, detergent extracts of six mice (1-6) were subjected to the analysis using the OXPHOS antibody cocktail accounting for ATP5A of complex (C) 5 (55 kDa), SDHB of C2 (30 kDa) and NDUFB8 of C1 (20 kDa) \* denote samples which contained higher ( $P < 0.05$ ) protein levels in the detergent extracts of the PGC-1alpha-TG mice than the WT mice. Please note that the immunoblots with the extracts of two additional striated muscles (RF and tongue) are presented in Fig. 6.
